# Supplementary material
Source: PubMed Central journal article supplement (PMC556410)
Supplement: 7600608s2.pdf [file 7600608s2.pdf]

Rocha et al. Supplementary Figure 2

**A**

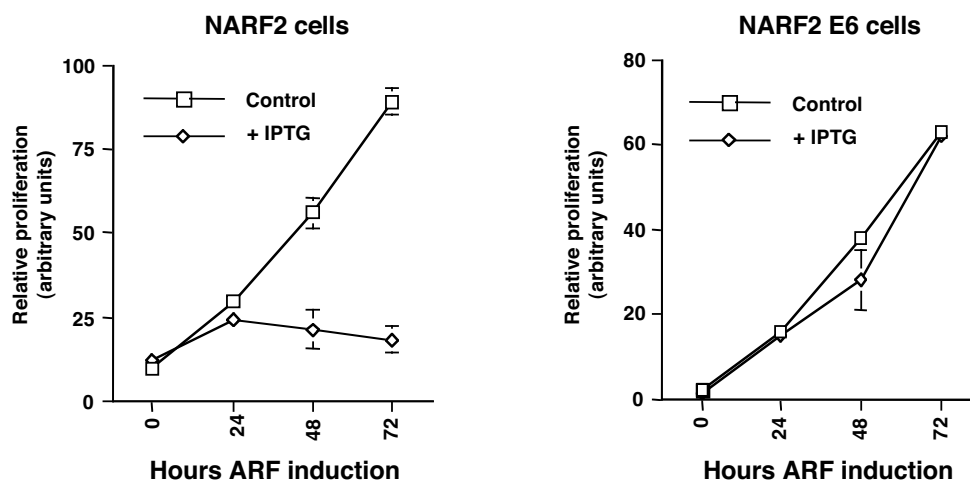

**B**

|     | NARF2<br>0 hrs | NARF2<br>24 hrs | NARF2<br>48 hrs |  | NARF2<br>E6<br>0 hrs | NARF2<br>E6<br>24 hrs | NARF2<br>E6<br>48 hrs |
|-----|----------------|-----------------|-----------------|--|----------------------|-----------------------|-----------------------|
| <G1 | 1.26           | 1.14            | 1.08            |  | 1.43                 | 1.19                  | 1.27                  |
| G1  | 53.95          | 60.29           | 70.16           |  | 47.63                | 49.49                 | 48.49                 |
| S   | 19.80          | 3.84            | 2.80            |  | 24.28                | 23.60                 | 23.37                 |
| G2  | 24.53          | 33.86           | 24.80           |  | 25.33                | 25.13                 | 26.21                 |
| >G2 | 1.26           | 1.10            | 1.40            |  | 1.96                 | 1.44                  | 1.76                  |

Supplementary Figure 2. Analysis of ARF effects of proliferation and cell cycle in NARF2 and NARF2 E6 cells.

(A) ARF does not inhibit cell proliferation in NARF2 E6 cells. ARF was induced in NARF2 and NARF2 E6 by IPTG treatment and cell proliferation was measured every 24 hours by alamarBlue assay. Results are obtained from 3 separate experiments performed in triplicate.

(B) Cell cycle effects of ARF induction. ARF was induced in NARF2 and NARF2 E6 by IPTG treatment and cell cycle status was measured every 24 hours by propidium iodide staining and FACS analysis. The percentage of cells in each stage of the cell cycle is shown.
